# Supplementary material for: Comparative Genomics and Phylogenetic Analysis Revealed the Chloroplast Genome Variation and Interspecific Relationships of Corylus (Betulaceae) Species
Source: Front Plant Sci. 2018 Jul 9;9:927. doi: 10.3389/fpls.2018.00927 (PMC6046460; doi:10.3389/fpls.2018.00927)
Supplement: Supplementary file 1 [file Table_1.XLSX]

## Sheet: Sheet1
Table S1 List of repeat sequences in the chloroplast genome of six Corylus species.
No.	Repeat length (bp)	Repeat A start site	Repeat A location	Repeat A region	Repeat B start site	Repeat B region	Repeat B region	Repeat type
C. yunnanensis
1	42	0	rpl22 / rpl2	LSC	160926	rpl2	IRb	F
2	42	0	rpl22 / rpl2	LSC	89292	rpl2	IRa	P
3	54	10	rpl22 / rpl2	LSC	160936	rpl2	IRb	F
4	54	10	rpl22 / rpl2	LSC	89270	rpl2	IRa	P
5	46	18	rpl22 / rpl2	LSC	160944	rpl2	IRb	F
6	46	18	rpl22 / rpl2	LSC	89270	rpl2	IRa	P
7	33	31	rpl22 / rpl2	LSC	160957	rpl2	IRb	F
8	33	31	rpl22 / rpl2	LSC	89270	rpl2	IRa	P
9	153	73	rpl22 / rpl2	LSC	160999	rpl2	IRb	F
10	153	73	rpl22 / rpl2	LSC	89108	rps19	IRa	P
11	32	2042	psbA / matK	LSC	2042	psbA / matK	LSC	P
12	35	4928	trnk-UUU / rps16	LSC	4947	trnk-UUU / rps16	LSC	F
13	30	7242	rps16 / trnQ-UUG	LSC	7250	rps16 / trnQ-UUG	LSC	R
14	32	9711	psbI / trnS-GCU	LSC	39772	psbC / trnS-UGA	LSC	F
15	30	9716	psbI / trnS-GCU	LSC	49474	trnS-GGA	LSC	P
16	31	10057	psbI / trnS-GCU	LSC	72674	rpl33 / rps18	LSC	P
17	32	15208	atpF / atpH	LSC	15208	atpF / atpH	LSC	P
18	33	16861	atpH / atpI	LSC	16882	atpH / atpI	LSC	F
19	30	16897	atpH / atpI	LSC	72665	rpl33 / rps18	LSC	P
20	30	39777	psbC / trnS-UGA	LSC	49474	trnS-GGA	LSC	P
21	39	40001	trnS-UGA / psbZ	LSC	40001	trnS-UGA / psbZ	LSC	P
22	30	43120	psaB	LSC	45344	psaA	LSC	F
23	39	48203	ycf3	LSC	103637	rps12 / trnV-GAC	IRa	F
24	37	48203	ycf3	LSC	126333	ndhA / orf188	SSC	F
25	39	48203	ycf3	LSC	146399	trnV-GAC / rps12	IRb	P
26	30	48215	ycf3	LSC	103649	rps12 / trnV-GAC	IRa	F
27	30	48215	ycf3	LSC	146396	trnV-GAC / rps12	IRb	P
28	32	55521	ndhC / trnV-UAC	LSC	55549	ndhC / trnV-UAC	LSC	F
29	31	63909	accD / psal	LSC	63950	accD / psal	LSC	F
30	37	70251	psbE / petL	LSC	70251	accD / psal	LSC	P
31	44	79095	psbT / psbN	LSC	79095	accD / psal	LSC	P
32	147	90495	rpl2	IRa	159427	rpl2	IRb	P
33	77	90651	rpl2	IRa	90727	rpl2 / rpl23	IRa	F
34	68	90660	rpl2	IRa	159363	rpl23 / rpl2	IRb	P
35	51	90660	rpl2	IRa	159571	rpl2	IRb	P
36	55	90673	rpl2	IRa	90749	rpl2 / rpl23	IRa	F
37	55	90673	rpl2	IRa	159363	rpl23 / rpl2	IRb	P
38	38	90673	rpl2	IRa	159571	rpl2	IRb	P
39	51	90736	rpl2 / rpl23	IRa	159571	rpl2	IRb	P
40	241	92110	ycf2	IRa	157552	ycf2	IRb	P
41	101	92250	ycf2	IRa	92422	ycf2	IRa	F
42	101	92250	ycf2	IRa	157792	ycf2	IRb	P
43	141	92382	ycf2	IRa	157792	ycf2	IRb	P
44	32	94179	ycf2	IRa	94200	ycf2	IRa	F
45	32	94179	ycf2	IRa	155843	ycf2	IRb	P
46	32	94200	ycf2	IRa	155864	ycf2	IRb	P
47	37	103637	rps12 / trnV-GAC	IRa	126333	ndhA / orf188	SSC	F
48	90	104330	rps12 / trnV-GAC	IRa	104490	rps12 / trnV-GAC	IRa	F
49	150	104338	rps12 / trnV-GAC	IRa	145501	trnV-GAC / rps12	IRb	P
50	30	104390	rps12 / trnV-GAC	IRa	104550	rps12 / trnV-GAC	IRa	F
51	63	104425	rps12 / trnV-GAC	IRa	104596	rps12 / trnV-GAC	IRa	F
52	84	104490	rps12 / trnV-GAC	IRa	145661	trnV-GAC / rps12	IRb	P
53	82	104498	rps12 / trnV-GAC	IRa	145569	trnV-GAC / rps12	IRb	P
54	30	104550	rps12 / trnV-GAC	IRa	145569	trnV-GAC / rps12	IRb	P
55	30	112743	rrn4.5 / rrn5	IRa	112774	rrn4.5 / rrn5	IRa	F
56	30	112743	rrn4.5 / rrn5	IRa	137345	rrn5 / rrn4.5	IRb	P
57	30	112774	rrn4.5 / rrn5	IRa	137376	rrn5 / rrn4.5	IRb	P
58	30	115034	ycf1	IRa	135085	ycf1	IRb	F
59	30	115034	ycf1	IRa	115034	ycf1	IRa	P
60	37	126333	ndhA / orf188	SSC	146401	trnV-GAC / rps12	IRb	P
61	56	130310	ycf1	SSC	130364	ycf1	SSC	F
62	32	133879	ycf1	SSC	133879	ycf1	SSC	P
63	30	135085	ycf1	IRb	135085	ycf1	IRb	P
64	30	137345	rrn5 / rrn4.5	IRb	137376	rrn5 / rrn4.5	IRb	F
65	78	145574	trnV-GAC / rps12	IRb	145660	trnV-GAC / rps12	IRb	F
66	32	155843	ycf2	IRb	155864	ycf2	IRb	F
67	101	157552	ycf2	IRb	157792	ycf2	IRb	F
68	144	157649	ycf2	IRb	157913	ycf2	IRb	F
69	194	159380	rpl2	IRb	159571	rpl2	IRb	F
C. mandshurica
1	44	6	rpl2	LSC	89307	rpl2	IRa	P
2	44	6	rpl2	LSC	160439	rpl2	IRb	F
3	37	19	rpl2	LSC	89301	rpl2	IRa	P
4	37	19	rpl2	LSC	160452	rpl2	IRb	F
5	58	36	rpl2	LSC	89263	rpl2	IRa	P
6	58	36	rpl2	LSC	160469	rpl2	IRb	F
7	196	57	rpl2 / trnH-GUG	LSC	89104	rps19 / rpl2	IRa	P
8	196	57	rpl2 / trnH-GUG	LSC	160490	rpl2 / rps19	IRb	F
9	158	95	rpl2 / trnH-GUG	LSC	89104	rps19 / rpl2	IRa	P
10	158	95	rpl2 / trnH-GUG	LSC	160528	rpl2 / rps19	IRb	F
11	136	117	rpl2 / trnH-GUG	LSC	89104	rps19 / rpl2	IRa	P
12	136	117	rpl2 / trnH-GUG	LSC	160550	rpl2 / rps19	IRb	F
13	32	2069	psbA / matK	LSC	2069	psbA / matK	LSC	P
14	35	4955	trnK-UUU / rps16	LSC	4974	trnK-UUU / rps16	LSC	F
15	30	7267	rps16 / trnQ-UUG	LSC	7275	rps16 / trnQ-UUG	LSC	R
16	32	9731	psbI / trnS-GCU	LSC	39781	psbC / trnS-UGA	LSC	F
17	30	9736	psbI / trnS-GCU	LSC	49481	trnS-GGA	LSC	P
18	31	13677	atpA / atpF	LSC	13677	atpA / atpF	LSC	P
19	32	15225	atpF / atpH	LSC	15225	atpF / atpH	LSC	P
20	33	16878	atpH / atpI	LSC	16899	atpH / atpI	LSC	F
21	31	34956	trnE-UUC / trnT-GGU	LSC	35044	trnE-UUC / trnT-GGU	LSC	R
22	30	39786	psbC / trnS-UGA	LSC	49481	trnS-GGA	LSC	P
23	39	40010	trnS-UGA / psbZ	LSC	40010	trnS-UGA / psbZ	LSC	P
24	30	43128	psaB	LSC	45352	psaA	LSC	F
25	39	48211	ycf3	LSC	103493	rps12 / trnV-GAC	IRa	F
26	39	48211	ycf3	LSC	146098	trnV-GAC / rps12	IRb	P
27	37	48211	ycf3	LSC	126060	ndhA / orf188	SSC	F
28	30	48223	ycf3	LSC	103505	rps12 / trnV-GAC	IRa	F
29	30	48223	ycf3	LSC	146095	trnV-GAC / rps12	IRb	P
30	32	55529	ndhC / trnV-UAC	LSC	55557	ndhC / trnV-UAC	LSC	F
31	31	63918	accD / psaI	LSC	63959	accD / psaI	LSC	F
32	37	70256	psbE / petL	LSC	70256	psbE / petL	LSC	P
33	44	79096	psbT / psbN	LSC	79096	psbT / psbN	LSC	P
34	147	90511	rpl2	IRa	158960	rpl2	IRb	P
35	160	92121	ycf2	IRa	157259	ycf2	IRb	P
36	39	92123	ycf2	IRa	157417	ycf2	IRb	P
37	82	92199	ycf2	IRa	92289	ycf2	IRa	F
38	32	94035	ycf2	IRa	94056	ycf2	IRa	F
39	32	94035	ycf2	IRa	155542	ycf2	IRb	P
40	32	94056	ycf2	IRa	155563	ycf2	IRb	P
41	37	103493	rps12 / trnV-GAC	IRa	126060	ndhA / orf188	SSC	F
42	37	104159	rps12 / trnV-GAC	IRa	145353	trnV-GAC / rps12	IRb	P
43	146	104162	rps12 / trnV-GAC	IRa	145209	trnV-GAC / rps12	IRb	P
44	46	104262	rps12 / trnV-GAC	IRa	104322	rps12 / trnV-GAC	IRa	F
45	30	112488	rrn4.5 / rrn5	IRa	112519	rrn4.5 / rrn5	IRa	F
46	30	112488	rrn4.5 / rrn5	IRa	137017	rrn5 / rrn4.5	IRb	P
47	30	112519	rrn4.5 / rrn5	IRa	137048	rrn5 / rrn4.5	IRb	P
48	30	114779	ycf1	IRa	114779	ycf1	IRa	P
49	30	114779	ycf1	IRa	134757	ycf1	IRb	F
50	37	126060	ndhA / orf188	SSC	146100	trnV-GAC / rps12	IRb	P
51	32	133551	ycf1	SSC	133551	ycf1	SSC	P
52	30	134757	ycf1	IRb	134757	ycf1	IRb	P
53	30	137017	rrn5 / rrn4.5	IRb	137048	rrn5 / rrn4.5	IRb	F
54	56	145299	trnV-GAC / rps12	IRb	145412	trnV-GAC / rps12	IRb	F
55	34	145321	trnV-GAC / rps12	IRb	145353	trnV-GAC / rps12	IRb	F
56	38	145353	trnV-GAC / rps12	IRb	145434	trnV-GAC / rps12	IRb	F
57	32	155542	ycf2	IRb	155563	ycf2	IRb	F
58	41	157378	ycf2	IRb	157496	ycf2	IRb	F
59	39	157378	ycf2	IRb	157417	ycf2	IRb	F
60	39	157417	ycf2	IRb	157496	ycf2	IRb	F
61	123	158985	rpl23 / rpl2	IRb	159157	rpl2	IRb	F
C. Americana
1	122	3	rpl22 / trnH-GUG	LSC	89140	rps19 / rpl2	IRa	P
2	122	3	rpl22 / trnH-GUG	LSC	160031	rpl2 / rps19	IRb	F
3	32	1923	psbA / matK	LSC	1923	psbA / matK	LSC	P
4	32	9595	psbI / trnS-GCU	LSC	39676	psbC / trnS-UGA	LSC	F
5	30	9600	psbI / trnS-GCU	LSC	49381	trnS-GGA	LSC	P
6	32	15116	atpF / atpH	LSC	15116	atpF / atpH	LSC	P
7	30	16227	atpH / atpI	LSC	132317	ycf1	SSC	F
8	31	16747	atpH / atpI	LSC	16747	atpH / atpI	LSC	R
9	33	16770	atpH / atpI	LSC	16791	atpH / atpI	LSC	F
10	30	34854	trnE-UUC / trnT-GGU	LSC	34943	trnE-UUC / trnT-GGU	LSC	R
11	30	39681	psbC / trnS-UGA	LSC	49381	trnS-GGA	LSC	P
12	39	39901	trnS-UGA / psbZ	LSC	39901	trnS-UGA / psbZ	LSC	P
13	30	43018	psaB	LSC	45242	psaA	LSC	F
14	39	48110	ycf3	LSC	103395	rps12 / trnV-GAC	IRa	F
15	39	48110	ycf3	LSC	145859	trnV-GAC / rps12	IRb	P
16	37	48110	ycf3	LSC	125909	ndhA / orf188	SSC	F
17	30	48122	ycf3	LSC	103407	rps12 / trnV-GAC	IRa	F
18	30	48122	ycf3	LSC	145856	trnV-GAC / rps12	IRb	P
19	36	50962	trnT-UGU / trnL-UAA	LSC	50962	trnT-UGU / trnL-UAA	LSC	P
20	35	55436	ndhC / trnV-UAC	LSC	55464	ndhC / trnV-UAC	LSC	F
21	32	63819	accD / psal	LSC	63860	accD / psal	LSC	F
22	113	69308	psbE	LSC	69425	psbE / petL	LSC	F
23	30	70277	psbE / petL	LSC	70277	psbE / petL	LSC	P
24	44	79128	psbT / psbN	LSC	79128	psbT / psbN	LSC	P
25	32	93945	ycf2	IRa	93966	ycf2	IRa	F
26	32	93945	ycf2	IRa	155295	ycf2	IRb	P
27	32	93966	ycf2	IRa	155316	ycf2	IRb	P
28	37	103395	rps12 / trnV-GAC	IRa	125909	ndhA / orf188	SSC	F
29	30	112331	rrn4.5 / rrn5	IRa	112362	rrn4.5 / rrn5	IRa	F
30	30	112331	rrn4.5 / rrn5	IRa	136859	rrn5 / rrn4.5	IRb	P
31	30	112362	rrn4.5 / rrn5	IRa	136890	rrn5 / rrn4.5	IRb	P
32	30	114614	ycf1	IRa	114614	ycf1	IRa	P
33	30	114614	ycf1	IRa	134607	ycf1	IRb	F
34	37	125909	ndhA / orf188	SSC	145861	trnV-GAC / rps12	IRb	P
35	32	133401	ycf1	SSC	133401	ycf1	IRb	P
36	30	134607	ycf1	IRb	134607	ycf1	IRb	P
37	30	136859	rrn5 / rrn4.5	IRb	136890	rrn5 / rrn4.5	IRb	F
38	38	145111	trnV-GAC / rps12	IRb	145129	trnV-GAC / rps12	IRb	F
39	32	155295	ycf2	IRb	155316	ycf2	IRb	F
C. kweichowensis
1	120	0	rpl22 / trnH-GUG	LSC	89005	rps19 / rpl2	IRa	P
2	120	0	rpl22 / trnH-GUG	LSC	159890	rpl2 / rps19	IRb	F
3	32	1936	psbA / matK	LSC	1936	psbA / matK	LSC	P
4	34	4817	trnK-UUU / rps16	LSC	4837	trnK-UUU / rps16	LSC	F
5	30	7136	rps16 / trnQ-UUG	LSC	7144	rps16 / trnQ-UUG	LSC	R
6	32	9600	psbI / trnS-GCU	LSC	39662	psbC / trnS-UGA	LSC	F
7	30	9605	psbI / trnS-GCU	LSC	49364	trnS-GGA	LSC	P
8	32	15096	atpF / atpH	LSC	15096	atpF / atpH	LSC	P
9	33	16749	atpH / atpI	LSC	16770	atpH / atpI	LSC	F
10	30	16785	atpH / atpI	LSC	72560	rpl33 / rps18	LSC	P
11	30	39667	psbC / trnS-UGA	LSC	49364	trnS-GGA	LSC	P
12	39	39891	trnS-UGA / psbZ	LSC	39891	trnS-UGA / psbZ	LSC	P
13	30	43010	psaB	LSC	45234	psaA	LSC	F
14	39	48093	ycf3	LSC	103264	rps12 / trnV-GAC	IRa	F
15	39	48093	ycf3	LSC	145712	trnV-GAC / rps12	IRb	P
16	37	48093	ycf3	LSC	125798	ndhA / orf188	SSC	F
17	30	48105	ycf3	LSC	103276	rps12 / trnV-GAC	IRa	F
18	30	48105	ycf3	LSC	145709	trnV-GAC / rps12	IRb	P
19	32	55411	ndhC / trnV-UAC	LSC	55439	ndhC / trnV-UAC	LSC	F
20	31	63799	accD / psal	LSC	63840	accD / psal	LSC	F
21	37	70146	psbE / petL	LSC	70146	psbE / petL	LSC	P
22	44	78992	psbT / psbN	LSC	78992	psbT / psbN	LSC	P
23	32	93806	ycf2	IRa	93827	ycf2	IRa	F
24	32	93806	ycf2	IRa	155156	ycf2	IRb	P
25	32	93827	ycf2	IRa	155177	ycf2	IRb	P
26	37	103264	rps12 / trnV-GAC	IRa	125798	ndhA / orf188	SSC	F
27	30	112210	rrn4.5 / rrn5	IRa	112241	rrn4.5 / rrn5	IRa	F
28	30	112210	rrn4.5 / rrn5	IRa	136755	rrn5 / rrn4.5	IRb	P
29	30	112241	rrn4.5 / rrn5	IRa	136786	rrn5 / rrn4.5	IRb	P
30	30	114501	ycf1	IRa	114501	ycf1	IRa	P
31	30	114501	ycf1	IRa	134495	ycf1	IRb	F
32	37	125798	ndhA / orf188	SSC	145714	trnV-GAC / rps12	IRb	P
33	32	133289	ycf1	SSC	133289	ycf1	SSC	P
34	30	134495	ycf1	IRb	134495	ycf1	IRb	P
35	30	136755	rrn5 / rrn4.5	IRb	136786	rrn5 / rrn4.5	IRb	F
36	32	155156	ycf2	IRb	155177	ycf2	IRb	F
C. ferox
1	104	0	rpl22 / trnH-GUG	LSC	88920	rps19 / rpl2	IRa	P
2	104	0	rpl22 / trnH-GUG	LSC	159850	rpl2 / rps19	IRb	F
3	32	1897	psbA / matK	LSC	1897	psbA / matK	LSC	P
4	32	9559	psbI / trnS-GCU	LSC	39587	psbC / trnS-UGA	LSC	F
5	30	9564	psbI / trnS-GCU	LSC	49301	trnS-GGA	LSC	P
6	34	11396	trnG-GCC / trnR-UCU	LSC	11404	trnG-GCC / trnR-UCU	LSC	R
7	31	11397	trnG-GCC / trnR-UCU	LSC	16696	atpH / atpI	LSC	F
8	32	15044	atpF / atpH	LSC	15044	atpF / atpH	LSC	P
9	30	16162	atpH / atpI	LSC	132121	ycf1	SSC	F
10	31	16682	atpH / atpI	LSC	16682	atpH / atpI	LSC	R
11	57	29997	rpoB / trnC-GCA	LSC	30054	rpoB / trnC-GCA	LSC	F
12	30	39592	psbC / trnS-UGA	LSC	49301	trnS-GGA	LSC	P
13	39	39816	trnS-UGA / psbZ	LSC	39816	trnS-UGA / psbZ	LSC	P
14	38	42918	psaB	LSC	45142	psaA	LSC	F
15	30	42926	psaB	LSC	45150	psaA	LSC	F
16	39	48028	ycf3	LSC	103187	rps12 / trnV-GAC	IRa	F
17	39	48028	ycf3	LSC	145648	trnV-GAC / rps12	IRb	P
18	37	48028	ycf3	LSC	125703	ndhA / orf188	SSC	F
19	30	48040	ycf3	LSC	103199	rps12 / trnV-GAC	IRa	F
20	30	48040	ycf3	LSC	145645	trnV-GAC / rps12	IRb	P
21	32	52825	trnF-GAA / ndhJ	LSC	52846	trnF-GAA / ndhJ	LSC	F
22	32	55346	ndhC / trnV-UAC	LSC	55374	ndhC / trnV-UAC	LSC	F
23	44	78899	psbT / psbN	LSC	78899	psbT / psbN	LSC	P
24	200	88462	rpl22 / rps19	LSC	160212	rps19 / rpl2	IRb	P
25	32	93723	ycf2	IRa	93744	ycf2	IRa	F
26	32	93723	ycf2	IRa	155098	ycf2	IRb	P
27	32	93744	ycf2	IRa	155119	ycf2	IRb	P
28	37	103187	rps12 / trnV-GAC	IRa	125703	ndhA / orf188	SSC	F
29	30	112130	rrn4.5 / rrn5	IRa	112161	rrn4.5 / rrn5	IRa	F
30	30	112130	rrn4.5 / rrn5	IRa	136672	rrn5 / rrn4.5	IRb	P
31	30	112161	rrn4.5 / rrn5	IRa	136703	rrn5 / rrn4.5	IRb	P
32	30	114413	ycf1	IRa	114413	ycf1	IRa	P
33	30	114413	ycf1	IRa	134420	ycf1	IRb	F
34	37	125703	ndhA / orf188	SSC	145650	trnV-GAC / rps12	IRb	P
35	37	132035	ycf1	SSC	132035	ycf1	SSC	P
36	30	132035	ycf1	SSC	132050	ycf1	SSC	F
37	32	133205	ycf1	SSC	133205	ycf1	SSC	P
38	30	134420	ycf1	IRb	134420	ycf1	IRb	P
39	30	136672	rrn5 / rrn4.5	IRb	136703	rrn5 / rrn4.5	IRb	F
40	32	155098	ycf2	IRb	155119	ycf2	IRb	F
C. ferox var. thibetca
1	117	0	rpl22 / trnH-GUG	LSC	88485	rpl22	IRa	P
2	65	0	rpl22	LSC	160380	rpl22	IRb	F
3	32	1943	psbA / matK	LSC	1943	psbA / matK	LSC	P
4	34	5323	trnK-UUU / rps16	LSC	53235	trnF-GAA / ndhJ	LSC	P
5	30	7121	rps16 / trnQ-UUG	LSC	7129	rps16 / trnQ-UUG	LSC	R
6	32	9585	psbI / trnS-GCU	LSC	39671	psbC / trnS-UGA	LSC	F
7	30	9590	psbI / trnS-GCU	LSC	49370	trnS-GGA	LSC	P
8	30	9922	trnS-GCU / trnG-GCC	LSC	32005	petN / psbM	LSC	C
9	32	15081	atpF / atpH	LSC	15081	atpF / atpH	SSC	P
10	31	16712	atpH / atpI	LSC	16712	atpH / atpI	LSC	R
11	33	16735	atpH / atpI	LSC	16756	atpH / atpI	LSC	F
12	31	34842	trnE-UUC / trnT-GGU	LSC	34930	trnE-UUC / trnT-GGU	LSC	R
13	30	39676	psbC / trnS-UGA	LSC	49370	trnS-GGA	LSC	P
14	39	39900	trnS-UGA / psbZ	LSC	39900	trnS-UGA / psbZ	LSC	P
15	38	43009	psaB	LSC	45233	psaA	LSC	F
16	30	43017	psaB	LSC	45241	psaA	LSC	F
17	39	48100	ycf3	LSC	103263	rps12 / trnV-GAC	IRa	F
18	39	48100	ycf3	LSC	145680	trnV-GAC / rps12	IRb	P
19	37	48100	ycf3	LSC	125755	ndhA / orf188	SSC	F
20	30	48112	ycf3	LSC	103275	rps12 / trnV-GAC	IRa	F
21	30	48112	ycf3	LSC	145677	trnV-GAC / rps12	IRb	P
22	32	55417	ndhC / trnV-UAC	LSC	55445	ndhC / trnV-UAC	LSC	F
23	31	63790	accD / psal	LSC	63831	accD / psal	LSC	F
24	37	70143	psbE / petL	LSC	70143	psbE / petL	LSC	P
25	44	78995	psbT / psbN	LSC	78995	psbT / psbN	LSC	P
26	32	93805	ycf2	IRa	93826	ycf2	IRa	F
27	32	93805	ycf2	IRa	155124	ycf2	IRb	P
28	32	93826	ycf2	IRa	155145	ycf2	IRb	P
29	37	103263	rps12 / trnV-GAC	IRa	125755	ndhA / orf188	SSC	F
30	30	112198	rrn4.5 / rrn5	IRa	112229	rrn4.5 / rrn5	IRa	F
31	30	112198	rrn4.5 / rrn5	IRa	136712	rrn5 / rrn4.5	IRb	P
32	30	112229	rrn4.5 / rrn5	IRa	136743	rrn5 / rrn4.5	IRb	P
33	30	114488	ycf1	IRa	114488	ycf1	IRa	P
34	30	114488	ycf1	IRa	134453	ycf1	IRb	F
35	31	117499	ndhF / rpl32	SSC	117499	ndhF / rpl32	SSC	R
36	37	125755	ndhA / orf188	SSC	145682	trnV-GAC / rps12	IRb	P
37	32	133247	ycf1	SSC	133247	ycf1	SSC	P
38	30	134453	ycf1	IRb	134453	ycf1	IRb	P
39	30	136712	rrn5 / rrn4.5	IRb	136743	rrn5 / rrn4.5	IRb	F
40	32	155124	ycf2	IRb	155145	ycf2	IRb	F
F= forward repeat; P= palindromic repeat; R= reverse repeat; C= complement repeat
