# Supplementary material for: Comparative Genomics and Phylogenetic Analysis Revealed the Chloroplast Genome Variation and Interspecific Relationships of Corylus (Betulaceae) Species
Source: Front Plant Sci. 2018 Jul 9;9:927. doi: 10.3389/fpls.2018.00927 (PMC6046460; doi:10.3389/fpls.2018.00927)
Supplement: Supplementary file 2 [file Table_2.XLSX]

## Sheet: Sheet1
Table S2 List of tandem repeats in the chloroplast genome of six Corylus species.
NO.	Indices	Repeat number	Size(bp)	Location	Region	Repeat sequence
C. yunnanensis
1	4924--4982	3	19	trnK-GUG / rps16	LSC	ATTTTTTTTTTTTTAATAA
2	12092--12137	2	24	trnR-UCU / atpA	LSC	ATACTTGTTCCTGAAGTAGAAATT
3	16858--16906	2	19	atpH / atpI	LSC	TTATATATATATAAATAGA
4	16866--16911	2	21	atpH / atpI	LSC	TATAAATAGATTATATATATT
5	35903--35950	3	14	trnM-CAU / psbD	LSC	ATAATGTATAATGA
6	40879--40925	2	23	trnG-UCC / trnfM-CAU	LSC	AGGGTAATAGGTTAATGTCTTTA
7	52991--53026	2	18	trnF-GAA / ndhJ	LSC	ATACATATTAAAATAGAA
8	55522--55581	2	28	ndhC / trnV-UAC	LSC	TATAGAAATATTCTATAAAAAACTAAAA
9	55789--55826	2	19	ndhC / trnV-UAC	LSC	TATTATAGTTAGATTATTA
10	59171--59210	2	20	atpB / rbcL	LSC	TCTTTCATTTGACTATCATT
11	90652--90804	2	76	rpl2 / rpl23	IRa	TACAAAAAGCTACGGCTCCATCGCGTGTGCTCGAGGTAGAAGTTTTGTATAAATGTATCGCCATGCTATTAAGTAT
12	94180--94247	3	21	ycf2	IRa	TTTTTGTCCAAGTTACTTCTT
13	96600--96641	2	18	ycf2	IRa	TATTGAGGATAGTGACGA
14	104367--104404	2	18	rps12 / trnV-GAC	IRa	TTTTCTATTATATTAGTA
15	112744--112804	2	31	rrn4.5 / rrn5	IRa	CATTGTTCAACTCTTTGACAACACGAAAAAC
16	115656--115701	2	23	ycf1 / ndhF	IRa	TTTCTAATTTAGAATATTTTATA
17	130311--130420	2	54	ycf1	SSC	TGTATTGCAATGGATTCATAAAAATTCTTCTTATTTTTATCAACTAGGTATCTT
18	137346--137406	2	31	rrn5 / rrn4.5	IRb	TTTTTCATGTTGTCAAAGAGTTGAACAATGG
19	145586--145623	2	18	trnV-GAC / rps12	IRb	AATACTAATATAATAGAA
20	145672--145709	2	18	trnV-GAC / rps12	IRb	AATACTAATATAATAGAA
21	153435--153476	2	18	ycf2	IRb	TCAATATCGTCACTATCA
22	155830--155918	4	21	ycf2	IRb	AAAAAGAGAAGTAACTTAGAC
23	159381--159765	2	191	rpl12	IRb	CGATACATTTATACAAAACTTCTACCTCGAGCACACGCGATGGAGCCGTAGACAGTCAAGTGAAATACAATCCACGAAATAATTTGATCTATGGACAGCATCATTGTGGTAAAGGTCGTAATTCCAGAGGAATCATTACCGCAGGACATAGAGGGGGAGGTCATAAGCGTCTATACCGTAAAATCGATTTT
C. mandshurica
1	4951--5009	3	19	trnK-UUU / rps16	LSC	ATTTTTTTTTTTTTAATAA
2	11640--11689	3	18	trnG-GCC / trnR-UCU	LSC	TAATGTAATTAATCAGAT
3	12108--12153	2	24	atpA	LSC	ATACTTGTTCCTGAAGTAGAAATT
4	16875--16923	2	19	atpH / atpI	LSC	TTATATATATATAAATAGA
5	16883--16928	2	21	atpH / atpI	LSC	TATAAATAGATTATATATATT
6	35924--35971	3	14	trnM-CAU / psbD	LSC	ATAATGTATAATGA
7	40887--40933	2	23	trnG-UCC / trnfM-CAU	LSC	AGGGTAATAGGTTAATGTCTTTA
8	52998--53033	2	18	trnF-GAA / ndhJ	LSC	ATACATATTAAAATAGAA
9	55530--55589	2	28	ndhC / trnV-UAC	LSC	TATAGAAATATTCTATAAAAAACTAAAA
10	55798--55835	2	19	ndhC / trnV-UAC	LSC	TATTATAGTTAGATTATTA
11	59180--59219	2	20	atpB / rbcL	LSC	TCTTTCATTTGACTATCATT
12	92200--92371	2	90	ycf2	IRa	TCAACTATTCAATCAAATGATATTGAGCATGTTTCCCATCTCTTCTCGAGAAACAAGTGGGCTATTTCTTTGCAAAATTGTGGTCGCTTT
13	94036--94103	3	21	ycf2	IRa	TTTTTGTCCAAGTTACTTCTT
14	96456--96497	2	18	ycf2	IRa	TATTGAGGATAGTGACGA
15	104223--104260	2	18	rps12 / trnV-GAC	IRa	TTTTCTATTATATTAGTA
16	112489--112549	2	31	rrn4.5 / rrn5	IRa	CATTGTTCAACTCTTTGACAACACGAAAAAC
17	115388--115433	2	23	ycf1 / ndhF	SSC	TTTCTAATTTAGAATATTTTATA
18	137018--137078	2	31	rrn5 / rrn4.5	IRb	TTTTTCATGTTGTCAAAGAGTTGAACAATGG
19	145258--145295	2	18	trnV-GAC / rps12	IRb	AATACTAATATAATAGAA
20	145322--145387	2	32	trnV-GAC / rps12	IRb	CGGTTCCGTTGCTACCGCGGGCTTTACGCAAT
21	153134--153175	2	18	ycf2	IRb	TCAATATCGTCACTATCA
22	155529--155617	4	21	ycf2	IRb	AAAAAGAGAAGTAACTTAGAC
23	157379--157456	2	39	ycf2	IRb	AACATGAGATAACAAATCCAGTCTTTCACTAAGATTTCG
C. Americana
1	4813--4852	2	20	trnK-UUU / rps16	LSC	ATTTATTTTTTTTTTAATAA
2	8610--8664	2	22	trnQ-UUG / psbK	LSC	TTATATTATTAAATATATTATT
3	11459--11529	3	27	trnG-GCC / trnR-UCU	LSC	ATATATTAATTATATTATATATTAAAA
4	11992--12037	2	24	trnR-UCU / atpA	LSC	ATACTTGTTCCTGAAGTAGAAATT
5	16745--16820	3	21	atpH / atpI	LSC	TATATATATTTATAAATAGAT
6	35807--35851	2	22	trnM-CAU / psbD	LSC	ATTATAATGAATAATCAAAATG
7	40777--40823	2	23	trnG-UCC / trnfM-CAU	LSC	AGGGTAATAGGTTAATGTCTTTA
8	52896--52931	2	18	trnF-GAA / ndhJ	LSC	ATACATATTAAAATAGAA
9	55437--55499	2	28	ndhC / trnV-UAC	LSC	TATATAAATATTCTATAAAGAACTAAAA
10	55706--55743	2	19	ndhC / trnV-UAC	LSC	TATTATAGTTAGATTATTA
11	59082--59119	2	20	atpB / rbcL	LSC	TCTTTCATTTGACTATCAGT
12	69309--69543	2	117	psbE / petL	LSC	TACATCGTAAGCTAAACCCGTGCTGACGAATAACCAACCCGCAATGAAAAGGGAAGGTATAGTAATGCTATGAATGACCCAGTATCGAATACTAGTAATAATATCAGCAAAAGAACG
13	93946--94013	3	21	ycf2	IRa	TTTTTGTCCAAGTTACTTCTT
14	96366--96407	2	18	ycf2	IRa	TATTGAGGATAGTGACGA
15	104127--104164	2	18	rps12 / trnV-GAC	IRa	TTTTCTATTATATTAGTA
16	112332--112392	2	31	rrn4.5 / rrn5	IRa	CATTGTTCAACTCTTTGACAACACGAAAAAC
17	115294--115331	2	19	ycf1 / ndhF	SSC	TTATATAACTTAACTTATA
18	136860--136920	2	31	rrn5 / rrn4.5	IRb	TTTTTCATGTTGTCAAAGAGTTGAACAATGG
19	145112--145167	3	18	trnV-GAC / rps12	IRb	AATACTAATATAATAGAA
20	152887--152928	2	18	ycf2	IRb	TCAATATCGTCACTATCA
21	155282--155370	4	21	ycf2	IRb	AAAAAGAGAAGTAACTTAGAC
C. kweichowensis
1	4818--4877	3	20	trnK-UUU / rps16	LSC	ATTTATTTTTTTTTTAATAA
2	11977--12022	2	24	trnR-UCU / atpA	LSC	ATACTTGTTCCTGAAGTAGAAATT
3	16746--16794	2	19	atpH / atpI	LSC	TTATATATATATAAATAGA
4	16754--16799	2	21	atpH / atpI	LSC	TATAAATAGATTATATATATT
5	35793--35840	3	14	trnM-CAU / psbD	LSC	ATAATGTATAATGA
6	40769--40815	2	23	trnG-UCC / trnfM-CAU	LSC	AGGGTAATAGGTTAATGTCTTTA
7	52881--52916	2	18	trnF-GAA / ndhJ	LSC	ATACATATTAAAATAGAA
8	55412--55471	2	28	trnV-UAC / trnM-CAU	LSC	TATAGAAATATTCTATAAAAAACTAAAA
9	55679--55716	2	19	trnT-GGU / atpE	LSC	TATTATAGTTAGATTATTA
10	59061--59100	2	20	atpB / rbcL	LSC	TCTTTCATTTGACTATCATT
11	93807--93874	3	21	ycf2	IRa	TTTTTGTCCAAGTTACTTCTT
12	96227--96268	2	18	ycf2	IRa	TATTGAGGATAGTGACGA
13	103994--104031	2	18	rps12 / trnV-GAC	IRa	TTTTCTATTATATTAGTA
14	112211--112271	2	31	rrn4.5 / rrn5	IRa	CATTGTTCAACTCTTTGACAACACGAAAAAC
15	115123--115168	2	23	ycf1 / ndhF	SSC	TTTCTAATTTAGAATATTTTATA
16	136756--136816	2	31	rrn5 / rrn4.5	IRb	TTTTTCATGTTGTCAAAGAGTTGAACAATGG
17	144985--145022	2	18	trnV-GAC / rps12	IRb	AATACTAATATAATAGAA
18	152748--152789	2	18	ycf2	IRb	TCAATATCGTCACTATCA
19	155143--155231	4	21	ycf2	IRb	AAAAAGAGAAGTAACTTAGAC
C. ferox
1	8578--8628	2	21	trnQ-UUG / psbK	LSC	TATTATTAAATTATTAATTTA
2	11401--11448	3	15	trnG-GCC / trnR-UCU	LSC	ATTTATTATATATTA
3	11928--11973	2	24	trnR-UCU / atpA	LSC	ATACTTGTTCCTGAAGTAGAAATT
4	29998--30111	2	57	rpoB / trnC-GCA	LSC	TATATTCATAATTGCTGTTATGATTGAAATTAAGAAGGATTTTTTTTATATCATTAG
5	40691--40737	2	23	trnG-UCC / trnfM-CAU	LSC	AGGGTAATAGGTTAATGTCTTTA
6	52833--52878	2	21	trnF-GAA / ndhJ	LSC	TCAATTAGTTGGTTGAAAGAC
7	55347--55406	2	28	ndhC / trnV-UAC	LSC	TATAGAAATATTCTATAAAAAACTAAAA
8	58973--59012	3	20	atpB / rbcL	LSC	TCTTTCATTTGACTATCATT
9	93724--93791	2	21	ycf2	IRa	TTTTTGTCCAAGTTACTTCTT
10	96144--96185	2	18	ycf2	IRa	TATTGAGGATAGTGACGA
11	103917--103954	2	18	rps12 / trnV-GAC	IRa	TTTTCTATTATATTAGTA
12	112131--112191	2	31	rrn4.5 / rrn5	IRa	CATTGTTCAACTCTTTGACAACACGAAAAAC
13	115050--115100	3	16	ycf1 / ndhF	IRa	TATAATATATATATAA
14	115050--115109	2	30	ycf1 / ndhF	IRa	TATAATATATATATAATATAACTTATATAA
15	132041--132080	3	15	ycf1	SSC	CATTTATAAATGTAG
16	136673--136733	2	31	rrn5 / rrn4.5	IRb	TTTTTCATGTTGTCAAAGAGTTGAACAATGG
17	144921--144958	2	18	trnV-GAC / rps12	IRb	AATACTAATATAATAGAA
18	152690--152731	2	18	ycf2	IRb	TCAATATCGTCACTATCA
19	155085--155173	4	21	ycf2	IRb	AAAAAGAGAAGTAACTTAGAC
C. ferox var. thibetca
1	11962--12007	2	24	trnR-UCU / atpA	LSC	ATACTTGTTCCTGAAGTAGAAATT
2	16710--16785	4	21	atpH / atpI	LSC	TATATATATTTATAAATAGAT
3	35801--35848	3	14	trnM-CAU / psbD	LSC	ATAATGTATAATGA
4	40776--40822	2	23	trnG-UCC / trnfM-CAU	LSC	AGGGTAATAGGTTAATGTCTTTA
5	52883--52918	2	18	trnF-GAA / ndhJ	LSC	ATACATATTAAAATAGAA
6	55418--55477	2	28	ndhC / trnV-UAC	LSC	TATAGAAATATTCTATAAAAAACTAAAA
7	55685--55722	2	19	ndhC / trnV-UAC	LSC	TATTATAGTTAGATTATTA
8	59051--59090	2	20	atpB / rbcL	LSC	TCTTTCATTTGACTATCATT
9	63961--64004	2	22	accD / psaI	LSC	ATTATGTACTCACATATACTCA
10	93806--93873	3	21	ycf2	IRa	TTTTTGTCCAAGTTACTTCTT
11	96226--96267	2	18	ycf2	IRa	TATTGAGGATAGTGACGA
12	103993--104030	2	18	rps12 / trnV-GAC	IRa	TTTTCTATTATATTAGTA
13	112199--112259	2	31	rrn4.5 / rrn5	IRa	CATTGTTCAACTCTTTGACAACACGAAAAAC
14	115143--115180	2	19	ycf1 / ndhF	SSC	TTATATAACTTAACTTATA
15	136713--136773	2	31	rrn5 / rrn4.5	IRb	TTTTTCATGTTGTCAAAGAGTTGAACAATGG
16	144953--144990	2	18	trnV-GAC / rps12	IRb	AATACTAATATAATAGAA
17	152716--152757	2	18	ycf2	IRb	TCAATATCGTCACTATCA
18	155111--155199	4	21	ycf2	IRb	AAAAAGAGAAGTAACTTAGAC
