# Supplementary material for: Comparative Genomics and Phylogenetic Analysis Revealed the Chloroplast Genome Variation and Interspecific Relationships of Corylus (Betulaceae) Species
Source: Front Plant Sci. 2018 Jul 9;9:927. doi: 10.3389/fpls.2018.00927 (PMC6046460; doi:10.3389/fpls.2018.00927)
Supplement: Supplementary file 3 [file Table_3.XLSX]

## Sheet: Sheet1
Table S3 List of SSRs in the chloroplast genome of six Corylus species.
No.	Type	start position	end position	repeat motif	repeat number	Location	Region
C. yunnanensis
1	Tri	3278	3290	AAT	4	matK	LSC
2	Mono	4929	4939	T	10	trnK-UUU / rps16	LSC
3	Mono	4945	4958	T	13	trnK-UUU / rps16	LSC
4	Mono	6027	6037	C	10	rps16 / trnQ-UUG	LSC
5	Mono	7731	7742	T	11	rps16 / trnQ-UUG	LSC
6	Mono	8247	8260	A	13	rps16 / trnQ-UUG	LSC
7	Mono	8724	8736	A	12	trnQ-UUG / psbK	LSC
8	Mono	9657	9667	A	10	psbI / trnS-GCU	LSC
9	Tetra	9867	9879	CTTT	3	trnS-GCU / trnG-GCC	LSC
10	Di	10067	10085	AT	9	trnS-GCU / trnG-GCC	LSC
11	Mono	10896	10907	A	11	trnS-GCU / trnG-GCC	LSC
12	Di	11519	11531	AT	6	trnG-GCC / trnR-UCU	LSC
13	Mono	11763	11773	A	10	trnG-GCC / trnR-UCU	LSC
14	Mono	13666	13679	T	13	atpA / atpF	LSC
15	Mono	14385	14396	T	11	atpF	LSC
16	Mono	18696	18707	T	11	rps2-rpoC2	LSC
17	Mono	18856	18869	A	13	rps2-rpoC2	LSC
18	Mono	20797	20807	T	10	rpoC2	LSC
19	Mono	20925	20936	T	11	rpoC2	LSC
20	Mono	21463	21475	T	12	rpoC2	LSC
21	Di	22304	22314	AT	5	rpoC2	LSC
22	Mono	28712	28722	T	10	rpoB	LSC
23	Mono	30566	30580	C	14	rpoB / trnC-GCA	LSC
24	Mono	30580	30590	A	10	rpoB / trnC-GCA	LSC
25	Mono	30771	30781	G	10	trnC-GCA / petN	LSC
26	Mono	31888	31900	T	12	petN / petM	LSC
27	Di	35541	35551	AT	5	trnE-UUC / trnT-GGU	LSC
28	Mono	36325	36336	T	11	trnM-CAU / psbD	LSC
29	Tetra	39987	39999	ATCT	3	trnS-UGA / psbZ	LSC
30	Mono	40738	40751	A	13	psbZ / trnG-UCC	LSC
31	Mono	46712	46722	A	10	psaA / ycf3	LSC
32	Mono	49100	49111	A	11	ycf3 / trnS-GGA	LSC
33	Mono	52522	52533	T	11	trnL-UAA / trnF-GAA	LSC
34	Mono	54862	54872	T	10	ndhK	LSC
35	Di	55454	55464	AT	5	ndhC / trnV-UAC	LSC
36	Mono	55745	55755	T	10	ndhC / trnV-UAC	LSC
37	Mono	58850	58860	T	10	atpB	LSC
38	Mono	59341	59351	T	10	atpB / rbcL	LSC
39	Di	63906	63916	AT	5	accD / psal	LSC
40	Mono	65338	65350	T	12	ycf4 / cemA	LSC
41	Mono	68064	68075	A	11	petA / psbJ	LSC
42	Mono	68282	68294	A	12	atpH / atpI	LSC
43	Di	68386	68396	AT	5	atpH / atpI	LSC
44	Mono	68434	68447	G	13	atpH / atpI	LSC
45	Tetra	68457	68469	CTTT	3	atpH / atpI	LSC
46	Di	72679	72699	AT	10	rpl33/ rps18	LSC
47	Mono	75491	75501	A	10	clpP	LSC
48	Mono	76325	76335	T	10	clpP	LSC
49	Mono	76910	76920	A	10	clpP / psbB	LSC
50	Di	85338	85348	AT	5	rps8 / rpl14	LSC
51	Di	89749	89761	AT	6	rpl2	IRa
52	Tetra	111336	111348	AGGT	3	rrn23	IRa
53	Di	113232	113242	AG	5	rrn5 / trnR-ACG	IRa
54	Tri	116460	116472	ATT	5	ndhF	SSC
55	Tetra	117977	117989	AAAT	3	ndhF / rpl32	SSC
56	Mono	118036	118046	T	10	ndhF / rpl32	SSC
57	Mono	118619	118629	A	10	ndhF / rpl32	SSC
58	Mono	119164	119174	A	10	rpl32 / trnL-UAG	SSC
59	Di	119401	119411	AT	5	rpl32 / trnL-UAG	SSC
60	Di	119543	119553	AT	5	rpl32 / trnL-UAG	SSC
61	Mono	119673	119686	A	13	rpl32 / trnL-UAG	SSC
62	Di	121230	121240	AT	5	ccsA / ndhD	SSC
63	Mono	123083	123094	T	11	ndhD / psaC	SSC
64	Mono	126794	126804	T	10	ndhA / orf188	SSC
65	Di	129658	129672	AT	7	rps15 / ycf1	SSC
66	Mono	130832	130843	T	11	ycf1	SSC
67	Mono	132797	132807	T	10	ycf1	IRb
68	Di	136909	136919	CT	5	trnR-ACG / rrn5	IRb
69	Tetra	138803	138815	ACCT	3	rrn23	IRb
70	Di	160501	160513	AT	6	rpl2	IRb
C. mandshurica
1	Tri	3305	3317	AAT	4	matK	LSC
2	Mono	4956	4966	T	10	trnK-UUU / rps16	LSC
3	Mono	4972	4985	T	13	trnK-UUU / rps16	LSC
4	Mono	7756	7767	T	11	rps16 / trnQ-UUG	LSC
5	Mono	7992	8002	T	10	rps16 / trnQ-UUG	LSC
6	Mono	8273	8285	A	12	rps16 / trnQ-UUG	LSC
7	Mono	8749	8761	A	12	trnQ-UUG / psbK	LSC
8	Mono	9677	9687	A	10	psbI / trnS-GCU	LSC
9	Tetra	9887	9899	CTTT	3	trnS-GCU / trnG-GCC	LSC
10	Di	10087	10101	AT	7	trnS-GCU / trnG-GCC	LSC
11	Mono	10912	10923	A	11	trnS-GCU / trnG-GCC	LSC
12	Di	11535	11547	AT	6	trnG-GCC / trnR-UCU	LSC
13	Mono	11779	11789	A	10	trnG-GCC / trnR-UCU	LSC
14	Mono	13682	13694	T	12	atpA / atpF	LSC
15	Mono	13695	13705	A	10	atpA / atpF	LSC
16	Mono	14262	14272	T	10	atpF	LSC
17	Mono	14402	14413	T	11	atpF	LSC
18	Mono	18713	18724	T	11	rps2-rpoC2	LSC
19	Mono	18873	18885	A	12	rps2-rpoC2	LSC
20	Mono	20813	20823	T	10	rpoC2	LSC
21	Mono	20941	20952	T	11	rpoC2	LSC
22	Mono	21479	21491	T	12	rpoC2	LSC
23	Di	22320	22330	AT	5	rpoC2	LSC
24	Mono	28729	28739	T	10	rpoB	LSC
25	Mono	30583	30597	C	14	rpoB / trnC-GCA	LSC
26	Mono	30597	30607	A	10	rpoB / trnC-GCA	LSC
27	Mono	30788	30799	G	11	trnC-GCA / petN	LSC
28	Mono	31906	31917	T	11	petN / petM	LSC
29	Di	35558	35568	AT	5	trnE-UUC / trnT-GGU	LSC
30	Hexa	35893	35911	AATTTT	3	trnM-CAU / psbD	LSC
31	Mono	36346	36356	T	10	trnM-CAU / psbD	LSC
32	Mono	36620	36630	A	10	trnM-CAU / psbD	LSC
33	Tetra	39996	40008	ATCT	3	trnS-UGA / psbZ	LSC
34	Mono	40747	40759	A	12	psbZ / trnG-UCC	LSC
35	Mono	46720	46730	A	10	psaA / ycf3	LSC
36	Mono	49108	49118	A	10	ycf3 / trnS-GGA	LSC
37	Mono	52529	52540	T	11	trnL-UAA / trnF-GAA	LSC
38	Mono	53364	53374	T	10	trnF-GAA / ndhJ	LSC
39	Mono	54870	54880	T	10	ndhK	LSC
40	Di	55462	55472	AT	5	ndhC / trnV-UAC	LSC
41	Mono	55753	55764	T	11	ndhC / trnV-UAC	LSC
42	Mono	58859	58869	T	10	atpB	LSC
43	Mono	59350	59360	T	10	atpB / rbcL	LSC
44	Di	63915	63925	AT	5	accD / psal	LSC
45	Mono	65347	65358	T	11	ycf4 / cemA	LSC
46	Mono	68072	68082	A	10	petA / psbJ	LSC
47	Mono	68289	68301	A	12	petA / psbJ	LSC
48	Di	68393	68403	AT	5	petA / psbJ	LSC
49	Mono	68441	68452	G	11	petA / psbJ	LSC
50	Tetra	68462	68474	CTTT	3	petA / psbJ	LSC
51	Di	72684	72698	AT	7	rpl33/ rps18	LSC
52	Mono	75490	75501	A	11	clpP	LSC
53	Mono	76910	76921	A	11	clpP / psbB	LSC
54	Di	85339	85349	AT	5	rps8 / rpl14	LSC
55	Di	89745	89757	AT	6	rpl2	IRa
56	Tetra	111081	111093	AGGT	3	rrn23	IRa
57	Di	112977	112987	AG	5	rrn5 / trnR-ACG	IRa
58	Tri	116192	116204	ATT	4	ndhF	SSC
59	Tetra	117709	117721	AAAT	3	ndhF / rpl32	SSC
60	Mono	117768	117778	T	10	ndhF / rpl32	SSC
61	Mono	118351	118361	A	10	ndhF / rpl32	SSC
62	Mono	118896	118906	A	10	rpl32 / trnL-UAG	SSC
63	Di	119133	119143	AT	5	rpl32 / trnL-UAG	SSC
64	Di	119275	119285	AT	5	rpl32 / trnL-UAG	SSC
65	Mono	119405	119418	A	13	rpl32 / trnL-UAG	SSC
66	Di	120959	120969	AT	5	ccsA / ndhD	SSC
67	Di	129384	129398	AT	7	rps15 / ycf1	SSC
68	Mono	130504	130515	T	11	ycf1	SSC
69	Mono	132469	132479	T	10	ycf1	SSC
70	Di	136581	136591	CT	5	trnR-ACG / rrn5	IRb
71	Tetra	138475	138487	ACCT	3	rrn23	IRb
72	Di	160035	160047	AT	6	rpl2	IRb
C. americana
1	Mono	91	102	A	11	rpl22 / trnH-GUG	LSC
2	Tri	3164	3176	AAT	4	matK	LSC
3	Mono	4057	4067	A	10	matK / trnK-UUU	LSC
4	Mono	4340	4350	T	10	matK / trnK-UUU	LSC
5	Mono	4655	4666	A	11	trnK-UUU / rps16	LSC
6	Mono	4818	4828	T	10	trnK-UUU / rps16	LSC
7	Mono	5327	5339	A	12	trnK-UUU / rps16	LSC
8	Mono	5898	5908	C	10	rps16 / trnQ-UUG	LSC
9	Mono	7599	7610	T	11	rps16 / trnQ-UUG	LSC
10	Mono	7835	7845	T	10	rps16 / trnQ-UUG	LSC
11	Mono	8115	8126	A	11	rps16 / trnQ-UUG	LSC
12	Mono	8590	8605	A	15	trnQ-UUG / psbK	LSC
13	Tetra	9751	9763	CTTT	3	trnS-GCU / trnG-GCC	LSC
14	Di	9954	9964	AT	5	trnS-GCU / trnG-GCC	LSC
15	Mono	10785	10796	A	11	trnS-GCU / trnG-GCC	LSC
16	Mono	11663	11673	A	10	trnG-GCC / trnR-UCU	LSC
17	Mono	13566	13581	T	15	atpA / atpF	LSC
18	Mono	14148	14158	T	10	atpF	LSC
19	Mono	14288	14298	T	10	atpF	LSC
20	Mono	15851	15861	T	10	atpH / atpI	LSC
21	Mono	16229	16239	T	10	atpH / atpI	LSC
22	Mono	18605	18615	T	10	rps2-rpoC2	LSC
23	Mono	18764	18778	A	14	rps2-rpoC2	LSC
24	Mono	20706	20716	T	10	rpoC2	LSC
25	Mono	20834	20845	T	11	rpoC2	LSC
26	Mono	21372	21384	T	12	rpoC2	LSC
27	Di	22213	22223	AT	5	rpoC2	LSC
28	Mono	24900	24915	C	15	rpoC1	LSC
29	Mono	24915	24925	A	10	rpoC1	LSC
30	Mono	28625	28635	T	10	rpoB	LSC
31	Mono	30479	30490	C	11	rpoB / trnC-GCA	LSC
32	Mono	30490	30501	A	11	rpoB / trnC-GCA	LSC
33	Mono	34755	34765	T	10	trnE-UUC / trnT-GGU	LSC
34	Di	35455	35465	AT	5	trnE-UUC / trnT-GGU	LSC
35	Mono	36051	36063	T	12	trnM-CAU / psbD	LSC
36	Mono	36221	36233	T	12	trnM-CAU / psbD	LSC
37	Mono	36499	36510	A	11	trnM-CAU / psbD	LSC
38	Mono	40638	40649	A	11	psbZ / trnG-UCC	LSC
39	Mono	46629	46640	A	11	psaA / ycf3	LSC
40	Mono	49007	49019	A	12	ycf3 / trnS-GGA	LSC
41	Mono	51364	51374	A	10	trnT-UGU / trnL-UAA	LSC
42	Mono	52429	52439	T	10	trnL-UAA / trnF-GAA	LSC
43	Di	55369	55379	AT	5	ndhC / trnV-UAC	LSC
44	Mono	55661	55672	T	11	ndhC / trnV-UAC	LSC
45	Mono	58767	58777	T	10	atpB	LSC
46	Mono	59252	59264	T	12	atpB / rbcL	LSC
47	Mono	64286	64296	T	10	psaI / ycf4	LSC
48	Mono	65255	65266	T	11	ycf4 / cemA	LSC
49	Mono	67980	67991	A	11	petA / psbJ	LSC
50	Mono	68198	68208	A	10	petA / psbJ	LSC
51	Di	68300	68310	AT	5	petA / psbJ	LSC
52	Tetra	68367	68379	CTTT	3	petA / psbJ	LSC
53	Mono	71656	71666	T	10	trnP-UGG / psaJ	LSC
54	Di	72701	72715	AT	7	rpl33/ rps18	LSC
55	Mono	75348	75358	T	10	clpP	LSC
56	Mono	75508	75522	A	14	clpP	LSC
57	Mono	76939	76953	A	14	clpP / psbB	LSC
58	Di	85376	85386	AT	5	rps8 / rpl14	LSC
59	Mono	85936	85946	A	10	rpl14 / rpl16	LSC
60	Mono	89165	89176	T	11	rps19 / rpl2	IRa
61	Di	89785	89797	AT	6	rpl2	IRa
62	Tetra	110924	110936	AGGT	3	rrn23	IRa
63	Di	112819	112829	AG	5	rrn5 / trnR-ACG	IRa
64	Tri	116048	116060	ATT	4	ndhF	SSC
65	Tetra	117565	117577	AAAT	3	ndhF / rpl32	SSC
66	Mono	117624	117634	T	10	ndhF / rpl32	SSC
67	Mono	118745	118760	A	15	rpl32 / trnL-UAG	SSC
68	Di	118988	118998	AT	5	rpl32 / trnL-UAG	SSC
69	Di	119130	119140	AT	5	rpl32 / trnL-UAG	SSC
70	Mono	119260	119270	A	10	rpl32 / trnL-UAG	SSC
71	Mono	119782	119794	C	12	trnL-UAG / ccsA	SSC
72	Di	120819	120829	AT	5	ccsA / ndhD	SSC
73	Mono	122664	122675	T	11	ndhD / psaC	SSC
74	Mono	124753	124763	T	10	ndhG / ndhI	SSC
75	Di	129241	129255	AT	7	rps15 / ycf1	SSC
76	Mono	130360	130371	T	11	ycf1	SSC
77	Mono	132319	132329	T	10	ycf1	SSC
78	Mono	132337	132348	T	11	ycf1	SSC
79	Mono	132973	132986	A	13	ycf1	SSC
80	Di	136424	136434	CT	5	trnR-ACG / rrn5	IRb
81	Tetra	138317	138329	ACCT	3	rrn23	IRb
82	Di	159498	159510	AT	6	rpl2	IRb
83	Mono	160119	160130	A	11	rpl2 / rps19	IRb
C. kweichowensis
1	Tri	3172	3184	AAT	4	matK	LSC
2	Mono	4823	4833	T	10	trnK-UUU / rps16	LSC
3	Mono	4843	4853	T	10	trnK-UUU / rps16	LSC
4	Mono	7625	7636	T	11	rps16 / trnQ-UUG	LSC
5	Mono	8141	8154	A	13	rps16 / trnQ-UUG	LSC
6	Mono	8618	8630	A	12	trnQ-UUG / psbK	LSC
7	Mono	9546	9556	A	10	psbI / trnS-GCU	LSC
8	Tetra	9756	9768	CTTT	3	trnS-GCU / trnG-GCC	LSC
9	Di	9956	9970	AT	7	trnS-GCU / trnG-GCC	LSC
10	Mono	10781	10791	A	10	trnS-GCU / trnG-GCC	LSC
11	Di	11403	11415	AT	6	trnG-GCC / trnR-UCU	LSC
12	Mono	11647	11658	A	11	trnG-GCC / trnR-UCU	LSC
13	Mono	13551	13564	T	13	atpA / atpF	LSC
14	Mono	13565	13575	A	10	atpA / atpF	LSC
15	Mono	14132	14143	T	11	atpF	LSC
16	Mono	14273	14284	T	11	atpF	LSC
17	Mono	18584	18595	T	11	rps2-rpoC2	LSC
18	Mono	18744	18757	A	13	rps2-rpoC2	LSC
19	Mono	20685	20695	T	10	rpoC2	LSC
20	Mono	20813	20824	T	11	rpoC2	LSC
21	Mono	21351	21363	T	12	rpoC2	LSC
22	Di	22192	22202	AT	5	rpoC2	LSC
23	Mono	28600	28610	T	10	rpoB	LSC
24	Mono	30454	30469	C	15	rpoB / trnC-GCA	LSC
25	Mono	30469	30480	A	11	rpoB / trnC-GCA	LSC
26	Mono	30661	30672	G	11	trnC-GCA / petN	LSC
27	Mono	31779	31790	T	11	petN / petM	LSC
28	Di	35431	35441	AT	5	trnE-UUC / trnT-GGU	LSC
29	Mono	36215	36226	T	11	trnM-CAU / psbD	LSC
30	Mono	36490	36500	A	10	trnM-CAU / psbD	LSC
31	Tetra	39877	39889	ATCT	3	trnS-UGA / psbZ	LSC
32	Mono	40628	40641	A	13	psbZ / trnG-UCC	LSC
33	Mono	46602	46612	A	10	psaA / ycf3	LSC
34	Mono	48990	49001	A	11	ycf3 / trnS-GGA	LSC
35	Mono	52412	52423	T	11	trnL-UAA / trnF-GAA	LSC
36	Mono	54752	54762	T	10	ndhK	LSC
37	Di	55344	55354	AT	5	ndhC / trnV-UAC	LSC
38	Mono	55635	55645	T	10	ndhC / trnV-UAC	LSC
39	Mono	58740	58750	T	10	atpB	LSC
40	Mono	59231	59241	T	10	atpB / rbcL	LSC
41	Di	63796	63806	AT	5	accD / psal	LSC
42	Mono	65228	65240	T	12	ycf4 / cemA	LSC
43	Mono	67961	67972	A	11	petA / psbJ	LSC
44	Mono	68179	68191	A	12	petA / psbJ	LSC
45	Di	68283	68293	AT	5	petA / psbJ	LSC
46	Mono	68331	68342	G	11	petA / psbJ	LSC
47	Tetra	68352	68364	CTTT	3	petA / psbJ	LSC
48	Di	72574	72594	AT	10	rpl33/ rps18	LSC
49	Mono	75386	75396	A	10	clpP	LSC
50	Mono	76220	76230	T	10	clpP / psbB	LSC
51	Mono	76805	76817	A	12	clpP / psbB	LSC
52	Di	85235	85245	AT	5	rps8 / rpl14	IRa
53	Di	89646	89658	AT	6	rpl2	IRa
54	Tetra	110803	110815	AGGT	3	rrn23	IRa
55	Di	112699	112709	AG	5	rrn5 / trnR-ACG	IRa
56	Tri	115927	115939	ATT	4	ndhF	SSC
57	Tetra	117444	117456	AAAT	3	ndhF / rpl32	SSC
58	Mono	117503	117513	T	10	ndhF / rpl32	SSC
59	Mono	118086	118096	A	10	ndhF / rpl32	SSC
60	Mono	118631	118641	A	10	rpl32 / trnL-UAG	SSC
61	Di	118868	118878	AT	5	rpl32 / trnL-UAG	SSC
62	Di	119010	119020	AT	5	rpl32 / trnL-UAG	SSC
63	Mono	119140	119154	A	14	rpl32 / trnL-UAG	SSC
64	Mono	119663	119673	C	10	trnL-UAG / ccsA	SSC
65	Di	120696	120706	AT	5	ccsA / ndhD	SSC
66	Mono	122549	122559	T	10	ndhD / psaC	SSC
67	Di	129122	129136	AT	7	rps15 / ycf1	SSC
68	Mono	130242	130253	T	11	ycf1	SSC
69	Mono	132207	132217	T	10	ycf1	SSC
70	Di	136319	136329	CT	5	trnR-ACG / rrn5	IRb
71	Tetra	138213	138225	ACCT	3	rrn23	IRb
72	Di	159359	159371	AT	6	rpl2	IRb
C. ferox
1	Mono	2492	2502	T	10	matK	LSC
2	Tri	3132	3144	AAT	4	matK	LSC
3	Mono	4620	4631	A	11	trnK-UUU / rps16	LSC
4	Mono	4802	4813	T	11	trnK-UUU / rps16	LSC
5	Mono	4835	4845	A	10	trnK-UUU / rps16	LSC
6	Mono	7573	7585	T	12	rps16 / trnQ-UUG	LSC
7	Mono	7803	7813	T	10	rps16 / trnQ-UUG	LSC
8	Mono	8083	8094	A	11	rps16 / trnQ-UUG	LSC
9	Mono	8558	8570	A	12	trnQ-UUG / psbK	LSC
10	Tetra	9715	9727	CTTT	3	trnS-GCU / trnG-GCC	LSC
11	Di	9905	9921	AT	8	trnS-GCU / trnG-GCC	LSC
12	Mono	11141	11151	T	10	trnS-GCU / trnG-GCC	LSC
13	Mono	13502	13513	T	11	atpA / atpF	LSC
14	Mono	14080	14090	T	10	atpF	LSC
15	Mono	14220	14232	T	12	atpF	LSC
16	Mono	15779	15789	T	10	atpH / atpI	LSC
17	Mono	16164	16174	T	10	atpH / atpI	LSC
18	Mono	18536	18547	T	11	rps2-rpoC2	LSC
19	Mono	18696	18706	A	10	rps2-rpoC2	LSC
20	Mono	20634	20644	T	10	rpoC2	LSC
21	Mono	20762	20773	T	11	rpoC2	LSC
22	Mono	21300	21312	T	12	rpoC2	LSC
23	Di	22141	22151	AT	5	rpoC2	LSC
24	Mono	24828	24839	C	11	rpoC1	LSC
25	Mono	24839	24849	A	10	rpoC1	LSC
26	Mono	28550	28560	T	10	rpoB	LSC
27	Mono	30407	30417	C	10	rpoB / trnC-GCA	LSC
28	Di	35368	35378	AT	5	trnE-UUC / trnT-GGU	LSC
29	Mono	35972	35982	T	10	trnM-CAU / psbD	LSC
30	Mono	36413	36424	A	11	trnM-CAU / psbD	LSC
31	Tetra	39802	39814	ATCT	3	trnS-UGA / psbZ	LSC
32	Mono	40553	40563	A	10	psbZ / trnG-UCC	LSC
33	Mono	46534	46546	A	12	psaA / ycf3	LSC
34	Mono	48925	48938	A	13	ycf3 / trnS-GGA	LSC
35	Mono	51273	51283	A	10	trnT-UGU / trnL-UAA	LSC
36	Mono	54690	54700	T	10	ndhK	LSC
37	Di	55275	55285	AT	5	ndhC / trnV-UAC	LSC
38	Tetra	55283	55295	ATTT	3	ndhC / trnV-UAC	LSC
39	Mono	58658	58668	T	10	atpB	LSC
40	Mono	59143	59157	T	14	atpB / rbcL	LSC
41	Mono	63202	63212	A	10	accD / psal	LSC
42	Mono	67638	67649	T	11	petA / psbJ	LSC
43	Mono	67869	67880	A	15	petA / psbJ	LSC
44	Mono	68087	68097	A	10	petA / psbJ	LSC
45	Di	72472	72486	AT	7	rpl33/ rps18	LSC
46	Mono	75119	75130	T	11	clpP	LSC
47	Mono	75280	75290	A	10	clpP	LSC
48	Mono	76115	76129	T	14	clpP	LSC
49	Mono	76713	76723	A	10	clpP / psbB	LSC
50	Mono	84310	84320	A	10	rpl36 / infA	LSC
51	Mono	84628	84638	T	10	infA / rps8	LSC
52	Di	85150	85160	AT	5	rps8 / rpl14	LSC
53	Mono	85710	85724	A	14	rpl14 / rpl16	LSC
54	Mono	88944	88954	T	10	rps19 / rpl2	IRa
55	Di	89563	89575	AT	6	rpl2	IRa
56	Mono	108633	108644	G	11	orf56	IRa
57	Tetra	110723	110735	AGGT	3	rrn23	IRa
58	Di	112618	112628	AG	5	rrn5 / trnR-ACG	IRa
59	Di	115054	115064	AT	5	ycf1 / ndhF	IRa
60	Tri	115837	115849	ATT	4	ndhF	SSC
61	Tetra	117354	117366	AAAT	3	ndhF / rpl32	SSC
62	Mono	117413	117424	T	11	ndhF / rpl32	SSC
63	Mono	118000	118010	A	10	ndhF / rpl32	SSC
64	Mono	118538	118552	A	14	rpl32 / trnL-UAG	SSC
65	Di	118778	118788	AT	5	rpl32 / trnL-UAG	SSC
66	Di	118920	118930	AT	5	rpl32 / trnL-UAG	SSC
67	Mono	119050	119064	A	14	rpl32 / trnL-UAG	SSC
68	Mono	119574	119587	C	13	trnL-UAG / ccsA	SSC
69	Mono	119608	119618	T	10	trnL-UAG / ccsA	SSC
70	Di	120613	120623	AT	5	ccsA / ndhD	SSC
71	Mono	122457	122468	T	11	ndhD / psaC	SSC
72	Mono	124547	124557	T	10	ndhG / ndhI	SSC
73	Di	129026	129038	AT	6	rps15 / ycf1	SSC
74	Mono	130143	130154	T	11	ycf1	SSC
75	Mono	132123	132133	T	10	ycf1	SSC
76	Mono	132141	132152	T	11	ycf1	SSC
77	Di	136237	136247	CT	5	trnR-ACG / rrn5	IRb
78	Tetra	138130	138142	ACCT	3	rrn23	IRb
79	Mono	140221	140232	C	11	orf56	IRb
80	Di	159301	159313	AT	6	rpl2	IRb
81	Mono	159922	159932	A	10	rpl2 / rps19	IRb
82	Penta	160195	160210	AAAAT	3	rps19 / rpl22	IRb
C. ferox var. thibetca
1	Tri	3179	3191	AAT	4	matK	LSC
2	Mono	4828	4838	T	10	trnK-UUU / rps16	LSC
3	Mono	5337	5348	A	11	trnK-UUU / rps16	LSC
4	Mono	7610	7621	T	11	rps16 / trnQ-UUG	LSC
5	Mono	8126	8139	A	13	rps16 / trnQ-UUG	LSC
6	Mono	8603	8615	A	12	trnQ-UUG / psbK	LSC
7	Mono	9531	9541	A	10	psbI / trnS-GCU	LSC
8	Tetra	9741	9753	CTTT	3	trnS-GCU / trnG-GCC	LSC
9	Di	9941	9955	AT	7	trnS-GCU / trnG-GCC	LSC
10	Mono	10766	10777	A	11	trnS-GCU / trnG-GCC	LSC
11	Di	11389	11401	AT	6	trnG-GCC / trnR-UCU	LSC
12	Mono	11633	11643	A	10	trnG-GCC / trnR-UCU	LSC
13	Mono	13536	13547	T	11	atpA / atpF	LSC
14	Mono	14114	14125	T	11	atpF	LSC
15	Mono	14255	14267	T	12	atpF	LSC
16	Mono	15108	15119	A	11	atpF / atpH	LSC
17	Mono	18570	18581	T	11	rps2-rpoC2	LSC
18	Mono	18730	18743	A	13	rps2-rpoC2	LSC
19	Mono	20671	20681	T	10	rpoC2	LSC
20	Mono	20799	20810	T	11	rpoC2	LSC
21	Mono	21337	21349	T	12	rpoC2	LSC
22	Di	22178	22188	AT	5	rpoC2	LSC
23	Mono	28586	28596	T	10	rpoB	LSC
24	Mono	30440	30455	C	15	rpoB / trnC-GCA	LSC
25	Mono	30455	30467	A	12	rpoB / trnC-GCA	LSC
26	Mono	30648	30660	G	12	trnC-GCA / petN	LSC
27	Mono	31766	31776	T	10	petN / petM	LSC
28	Mono	34750	34760	T	10	trnE-UUC / trnT-GGU	LSC
29	Mono	35131	35141	A	10	trnE-UUC / trnT-GGU	LSC
30	Di	35445	35455	AT	5	trnE-UUC / trnT-GGU	LSC
31	Mono	36223	36235	T	12	trnM-CAU / psbD	LSC
32	Mono	36499	36509	A	10	trnM-CAU / psbD	LSC
33	Tetra	39886	39898	ATCT	3	trnS-UGA / psbZ	LSC
34	Mono	40637	40648	A	11	psbZ / trnG-UCC	LSC
35	Mono	46609	46619	A	10	psaA / ycf3	LSC
36	Mono	48997	49007	A	10	ycf3 / trnS-GGA	LSC
37	Di	55350	55360	AT	5	ndhC / trnV-UAC	LSC
38	Mono	55641	55651	T	10	ndhC / trnV-UAC	LSC
39	Mono	58736	58746	T	10	atpB	LSC
40	Mono	59221	59231	T	10	atpB / rbcL	LSC
41	Mono	63308	63318	T	10	accD / psaI	LSC
42	Di	63787	63797	AT	5	accD / psaI	LSC
43	Mono	65235	65246	T	11	ycf4 / cemA	LSC
44	Mono	67960	67971	A	11	petA / psbJ	LSC
45	Mono	68178	68189	A	11	petA / psbJ	LSC
46	Di	68281	68291	AT	5	petA / psbJ	LSC
47	Mono	68329	68339	G	10	petA / psbJ	LSC
48	Tetra	68349	68361	CTTT	3	petA / psbJ	LSC
49	Di	72571	72587	AT	8	rpl33/ rps18	LSC
50	Mono	73843	73853	A	10	rpl20 / rps12	LSC
51	Mono	75380	75393	A	13	clpP	LSC
52	Mono	84399	84409	A	10	rpl36 / infA	LSC
53	Di	85238	85248	AT	5	rps8 / rpl14	LSC
54	Di	89645	89657	AT	6	rpl2	IRa
55	Tetra	110791	110803	AGGT	3	rrn23	IRa
56	Di	112686	112696	AG	5	rrn5 / trnR-ACG	IRa
57	Tri	115897	115909	ATT	4	ndhF	SSC
58	Tetra	117414	117426	AAAT	3	ndhF / rpl32	SSC
59	Mono	117473	117483	T	10	ndhF / rpl32	SSC
60	Mono	118056	118066	A	10	ndhF / rpl32	SSC
61	Mono	118601	118613	A	12	ndhF / rpl32	SSC
62	Di	118840	118850	AT	5	rpl32 / trnL-UAG	SSC
63	Di	118982	118992	AT	5	rpl32 / trnL-UAG	SSC
64	Mono	119106	119120	A	14	rpl32 / trnL-UAG	SSC
65	Di	120661	120671	AT	5	ccsA / ndhD	SSC
66	Mono	124599	124609	T	10	ndhG / ndhI	SSC
67	Mono	126189	126199	T	10	ndhA / orf188	SSC
68	Di	129080	129094	AT	7	rps15 / ycf1	SSC
69	Mono	130200	130211	T	11	ycf1	SSC
70	Mono	132165	132175	T	10	ycf1	SSC
71	Mono	133534	133544	A	10	ycf1	SSC
72	Di	136277	136287	CT	5	trnR-ACG / rrn5	IRb
73	Tetra	138170	138182	ACCT	3	rrn23	IRb
74	Di	159327	159339	AT	6	rpl2	IRb
Mono = mononucleotide; Di = Dinucleotide; Tri = Trinucleotide; Tetra = Tetranucleotide; Penta = Pentanucleotide;
Hexa = Hexanucleotide
