# Supplementary material for: Comparative Genomics and Phylogenetic Analysis Revealed the Chloroplast Genome Variation and Interspecific Relationships of Corylus (Betulaceae) Species
Source: Front Plant Sci. 2018 Jul 9;9:927. doi: 10.3389/fpls.2018.00927 (PMC6046460; doi:10.3389/fpls.2018.00927)
Supplement: Supplementary file 4 [file Table_4.XLSX]

## Sheet: Sheet1
Table S4. Ka, ks and ka/ks values of the protein-coding genes of the chloroplast genomes of the Corylus species. Values obtained from pairwise comparison between each of the six species with Corylus avellana.
Genome		C. yunnanensis			C. mandshurica			C. americana			C. kweichowensis			C. ferox			C. ferox var. thibetca
Region
	gene	ka	ks	ka/ks	ka	ks	ka/ks	ka	ks	ka/ks	ka	ks	ka/ks	ka	ks	ka/ks	ka	ks	ka/ks
LSC	psbA	0	0.0044	0	0	0.0087	0	0	0.0044	0	0	0.0044	0	0	0	/	0	0	/
	matK	0.0008	0.0031	0.2704	0.0008	0.0031	0.2704	0.0045	0.0049	0.9057	0.0008	0.0063	0.1344	0.0047	0.0189	0.2491	0.0008	0	/
	rps16	0	0	/	0	0	/	0	0	/	0	0	/	0	0	/	0	0	/
	psbK	0	0	/	0	0	/	0	0	/	/	/	/	0.0072	0	/	0	0	/
	psbI	0	0	/	0	0	/	0	0	/	0	0	/	0	0.0293	0	0	0	/
	atpA	0	0	/	0	0	/	0	0.0064	0	0	0	/	0	0.0096	0	0	0	/
	atpF	0	0.007	0	0	0.007	0	0.0042	0	/	0	0.007	0	0.0021	0	/	0	0	/
	atpH	0	0	/	0	0	/	0	0	/	0	0	/	0	0	/	0	0	/
	atpI	0	0	/	0	0	/	0	0	/	0	0	/	0	0.006	0	0	0	/
	rps2	0	0	/	0	0	/	0	0.01482	0	0	0	/	0	0.0074	0	0	0	/
	rpoC2	0.0006	0.0012	0.5178	0.0006	0.0012	0.5178	2.2079	4.8935	0.4512	0.0006	0.0012	0.5178	0.0022	0.0021	1.0625	0.0003	0	/
	rpoC1	0	0.0046	0	0	0.0046	0	/	/	/	0	0.0046	0	0	0.0091	0	0	0	/
	rpoB	0	0	/	0	0	/	0	0	/	0	0	/	0.0008	0.0031	0.2557	0	0	/
	petN	0	0	/	0	0	/	0	0	/	0	0	/	0	0	/	0	0	/
	psbM	0	0	/	0	0	/	0	0	/	0	0	/	0	0.0492	0	0	0	/
	psbD	0	0.004	0	0	0.004	0	0	0	/	0	0.004	0	0	0	/	0	0	/
	psbC	0	0	/	0	0	/	0	0.0028	0	0	0	/	0	0.0056	0	0	0	/
	psbZ	0	0	/	0	0	/	0	0	/	0	0	/	0	0	/	0	0	/
	rps14	0	0	/	0	0	/	0	0.0155	0	0.004	0	/	0	0.0311	0	0	0	/
	psaB	0	0	/	0	0	/	0	0	/	0	0	/	0.0006	0.0022	0.2669	0.0006	0	/
	psaA	0	0.0056	0	0	0.0056	0	0	0.0082	0	0	0.0056	0	0.0017	0.0116	0.1504	0.0006	0.0038	0.1554
	ycf3	0	0	/	0	0	/	0	0	/	0	0	/	0	0.0094	0	0	0	/
	rps4	0	0	/	0	0	/	0.0021	0	/	0	0	/	0.0021	0.0082	0.2537	0	0	/
	ndhJ	0	0	/	0	0	/	0	0	/	0	0	/	0	0	/	0	0	/
	ndhK	1.8756	3.6959	0.5075	0.0062	0.0105	0.5893	0	0.0173	0	1.9234	3.7204	0.5169	1.9128	3.7038	0.5165	0	0	/
	ndhC	0.0035	0	/	0	0	/	0	0	/	0	0	/	0.0035	0	/	0	0	/
	atpE	0	0	/	0	0	/	0	0	/	0	0	/	0	0	/	0	0	/
	atpB	0	0	/	0.0009	0	/	0.0009	0.0029	0.2998	0	0	/	0	0.0118	0	0	0	/
	rpcL	0.0018	0	/	0.0036	0	/	0.0018	0.0097	0.1859	0.0018	0	/	0	0.0032	0	0	0	/
	accD	0	0.0039	0	0	0.0078	0	0.0016	0.0077	0.203	0	0.0039	0	0.0024	0.0135	0.1805	0	0	/
	psaI	0	0	/	0	0	/	0	0.0383	0	0	0	/	0	0.0383	0	0	0	/
	ycf4	0	0	/	0	0	/	0	0	/	0	0	/	0	0	/	0	0	/
	cemA	0	0.0059	0	0	0	/	0	0	/	0	0	/	0	0.0059	0	0	0	/
	petA	0	0.0092	0	0	0.0092	0	0	0	/	0	0.0092	0	0	0.0139	0	0	0	/
	psbJ	0	0.0408	0	0	0.0408	0	0	0	/	0	0.0408	0	0	0	/	0	0	/
	psbL	0	0	/	0	0	/	0	0	/	0	0	/	0	0	/	0	0	/
	psbF	0	0	/	0	0	/	0	0	/	0	0	/	0	0	/	0	0	/
	psbE	0	0	/	0	0	/	/	/	/	0	0	/	0	0	/	0	0	/
	petL	0	0	/	0	0	/	0	0	/	0	0	/	0	0.0429	0	0	0	/
	petG	0	0	/	0	0	/	0	0	/	0	0	/	0	0	/	0	0	/
	psaJ	0	0	/	0	0	/	0.0113	0	/	0	0	/	0.0113	0	/	0	0	/
	rpl33	0	0	/	0	0	/	0	0.0287	0	0	0	/	0	0	/	0	0	/
	rps18	0	0	/	0	0	/	0	0	/	0	0	/	0	0.0318	0	0	0	/
	rpl20	0	0.0152	0	0	0.0152	0	0	0.0152	0	0	0.0152	0	0	0.0153	0	0	0	/
	rps12	0	0.0313	0	0	0.0313	0	0	0	/	0	0.0313	0	0	0	/	0	0	/
	clpP	0	0.0074	0	0	0.0074	0	0	0.0074	0	0	0.0074	0	0	0.0074	0	0	0.0074	0
	psbB	0	0.0029	0	0.0008	0	/	0	0	/	0	0	/	0	0.0059	0	0	0	/
	psbT	0	0	/	0	0	/	0	0	/	0	0	/	0	0	/	0	0	/
	psbN	0	0	/	0	0	/	0	0	/	0	0	/	0	0	/	0	0	/
	psbH	0	0.0224	0	0	0.0224	0	0	0	/	0	0.0224	0	0	0	/	0	0	/
	petB	0	0	/	0	0	/	0	0.0068	0	0	0	/	0	0.0068	0	0	0	/
	petD	0	0	/	0	0	/	0.0024	0	/	0	0	/	0.0024	0.0081	0.2993	0	0	/
	rpoA	0	0	/	0	0	/	0	0	/	0	0	/	0.0013	0.0108	0.1175	0	0	/
	rps11	0	0.01	0	0	0.01	0	0	0.01	0	0	0.01	0	0	0.01	0	0	0.01	0
	rpl36	0	0	/	0	0	/	0	0	/	0	0	/	0	0	/	0	0	/
	infA	0	0	/	0	0	/	0	0	/	0	0	/	0	0	/	0	0	/
	rps8	0	0	/	0	0	/	0	0.0101	0	0	0	/	0.0033	0.0102	0.3239	0	0	/
	rpl14	0	0	/	0	0	/	4.0946	3.1313	1.3076	0	0	/	0	0.013	0	0	0	/
	rpl16	0	0	/	0	0	/	0	0	/	0	0	/	0	0	/	0	0	/
	rps3	0.0038	0.0083	0.4509	0.0038	0.0083	0.4509	0.0019	0.025	0.0753	0.0038	0.0083	0.4509	0.0019	0.0083	0.2254	0	0.0167	0
	rpl22	0.0048	0	/	0.0048	0	/	0.0125	0.0098	1.2752	0.0048	0	/	0.0097	0.0222	0.4369	0.0024	0	/
IRs	rps19	0	0	/	0	0	/	0	0.019	0	0	0	/	0	0.019	0	0.0024	0	/
	rpl2	0	0	/	0	0	/	0	0	/	0	0	/	0	0	/	0	0	/
	rpl23	0	0	/	0	0	/	0	0	/	0	0	/	0	0	/	0	0	/
	ycf2	0.0004	0	/	2.216	5.369	0.4129	0.0002	0	/	0.0002	0	/	0.0008	0.0013	0.5866	0	0	/
	ndhB	0	0.0027	0	0	0.0027	0	0.0009	0	/	0	0.0027	0	0	0	/	0	0	/
	rps7	0	0	/	0	0	/	0	0	/	0	0	/	0	0	/	0	0	/
	rps12	0	0	/	0	0	/	0	0	/	0	0	/	0	0	/	0	0	/
SSC	ndhF	0.0011	0.0026	0.4306	/	/	/	0.0022	0.0028	0.7815	0.0011	0	/	0.0033	0.005	0.6476	0.0005	0	/
	rpl32	0	0	/	0	0	/	0	0	/	0	0	/	0	0	/	0	0	/
	ccsA	0.0013	0.005	0.2617	0.0027	0.005	0.5259	0.0039	0.005	0.7916	0.0013	0.005	0.2617	0.0039	0.0055	0.7129	0.0013	0	/
	ndhD	0.0009	0	/	0.0009	0	/	0	0.0154	0	0.0009	0	/	0.0018	0.0153	0.1191	0	0	/
	psaC	0	0	/	0	0	/	0	0	/	0	0	/	0	0	/	0	0	/
	ndhE	0.004	0	/	0.004	0	/	0.004	0	/	0.004	0	/	0.004	0	/	0.004	0	/
	ndhG	0	0	/	0	0	/	0	0.0085	0	0	0	/	0	0.0085	0	0	0	/
	ndhI	0.0024	0	/	0	0	/	0	0	/	0.0024	0	/	0.0024	0	/	0.0024	0	/
	ndhA	0	0	/	0	0	/	0	0.0039	0	0	0	/	0.0069	0.0048	1.4474	0.0012	0	/
	ndhH	0	0	/	0	0	/	0	0.0044	0	0	0	/	0.0021	0.0044	0.4783	0	0.0044	0
	rps15	0	0	/	0	0	/	0	0	/	0	0	/	0	0	/	0	0	/
	ycf1	0.0028	0.0009	3.058	0.0029	0.0008	3.7386	2.63	2.9029	0.9059	0.0028	0.0009	3.058	0.7008	0.9742	0.7193	0.001	0	/
